# Supplementary material
Source: Springer Nature journal article supplement (https://www.springermedizin.de/resource/supplementary/12984_2006_113_MOESM4_ESM.pdf/9605332)
Supplement: MOESM4 [file 9605332]

Table2 The ratios of pupil parameters obtained after video presentation to those obtained before video presentation, and differences in the scores of questionnaire before and after video presentation.

| <b>ratio/<br/>differences</b> | <b>ratio of D1</b> | <b>ratio of D2</b> | <b>CRratio</b> | <b>ratio in<br/>latency</b> | <b>ratio of vc</b> | <b>ratio of vd</b> | <b>ratio of ac</b> | <b>ratio in peak<br/>time</b> | <b>differences in<br/>the score of<br/>questionnaire</b> |
|-------------------------------|--------------------|--------------------|----------------|-----------------------------|--------------------|--------------------|--------------------|-------------------------------|----------------------------------------------------------|
| <b>movie A</b>                | 0.91 ± 0.08        | 0.88 ± 0.13        | 1.20 ± 0.36    | 1.01 ± 0.12                 | 1.08 ± 0.22        | 1.06 ± 0.42        | 1.10 ± 0.28        | 1.04 ± 0.31                   | 3.8 ± 7.6                                                |
| <b>movie D</b>                | 0.93 ± 0.09        | 0.89 ± 0.15        | 1.22 ± 0.32    | 0.99 ± 0.12                 | 1.12 ± 0.25        | 1.06 ± 0.50        | 1.06 ± 0.31        | 1.04 ± 0.26                   | 5.7 ± 10.1                                               |
| <b>movie R</b>                | 0.94 ± 0.08        | 0.94 ± 0.13        | 1.07 ± 0.34    | 1.02 ± 0.14                 | 1.00 ± 0.22        | 0.98 ± 0.40        | 1.03 ± 0.26        | 0.98 ± 0.19                   | 4.3 ± 8.7                                                |
